# Supplementary material for: An isotopic perspective on mass bias and matrix effects in multi-collector inductively-coupled-plasma mass spectrometry
Source: Royal Society of Chemistry journal article supplement (doi:10.1039/c2ja10382f), 2012-01-01

## **Electronic Supplementary Information**

**Title: An Isotopic Approach to Mass Bias and Matrix Effects in an Argon Plasma  
using Multi-Collector Inductively-Coupled-Plasma Mass Spectrometry.**

**Jane Barling<sup>1</sup> & Dominique Weis<sup>1</sup>**

### **Contents:**

Matrix Effects - Results of Batch Experiments

Additional Experimental Details

Table of Standard Running Conditions

<sup>1</sup>University of British Columbia, Pacific Centre for Isotopic and Geochemical Research,  
Dept. of Earth & Ocean Sciences, 6339 Stores Road, Vancouver, BC V6T 1Z4, Canada

## Matrix Effects: Batch Experiments

The results of 15 batch matrix experiments carried out over the course of a year are illustrated in Figure S1. Data have been normalized offline to the triple-spike values of Abouchami *et al.*<sup>1</sup>

## Experimental Details

Standard running conditions for the Nu Plasma at the PCIGR at the University of British Columbia are documented in Table S1. Instrument response to matrix has been found to vary from session to session (*e.g.* Ce in Figure S1), therefore for this study each experimental session consisted of a pair of axial plasma profiles; a matrix-free profile preceding a matrix-bearing one. This procedure allowed us to characterise the effect of the individual matrix elements on the plasma and through normalization of matrix-bearing profiles to their same session matrix-free profiles, to compare the effects of the different matrix elements run in separate sessions.

In order to ensure that torch positions were as accurate and reproducible as possible a number of precautions were taken: 1) The instrument software and in particular the Plasma Control Window, remained open throughout the period of the experiments to ensure that the stepper motor positions were not re-initialised. 2) The distance from the load coil to the tip of the sampler was measured with the torch in/out position set at 5.00mm to determine whether there was any significant offset between the digital position read from the stepper motors and the actual position of the torch with respect to the cones. 3) All profiles were carried out with the stepper motors stepping in the same direction (from 3.42 to 9.43mm for axial profiles and from 5.01 to 5.70mm for radial profiles). 4) At each step on axial profiles the radial position was checked and adjusted, if necessary, to maximize signal. 5) The torch was not changed or adjusted in its mount during the period of analysis.

To further limit the effects of variations in instrumental conditions and tuning parameters the experiments were carried out over a short period of time during which no sample material was introduced into the instrument and the instrument was not re-optimized for analysis of elements other than Pb. All *m/z* to be measured at each profile

point were grouped in batch runs so that the timing and sequence of measurements was identical for each step in each profile.

## References

1 W. Abouchami, S.J.G. Galer and A.W. Hofmann, *Chem. Geol.*, 2000, **169**, 187-209.

**Table S1: Standard Running Conditions**

|                            |                                                 |
|----------------------------|-------------------------------------------------|
| <b>Instrument</b>          | <b>Nu Plasma MC-ICP-MS</b>                      |
| RF power                   | 1300 W                                          |
| Reflected power            | <10 W                                           |
| Accelerating potential     | 4000 V                                          |
| Analyser pressure          | < 4 x 10 <sup>-9</sup> mbar under full gas load |
| Abundance sensitivity      | 3 – 4 ppm                                       |
| Cones                      | Ni (Nu Plasma Type B)                           |
| <u>Argon gas flows:</u>    |                                                 |
| - coolant                  | 13 l min <sup>-1</sup>                          |
| - auxiliary                | 0.70 l min <sup>-1</sup>                        |
| - nebuliser                | 35 – 40 psi                                     |
| <b>Sample introduction</b> | <b>Nu Plasma DSN 100</b>                        |
| - hot gas flow             | 0.25 l min <sup>-1</sup>                        |
| - membrane gas flow        | 2.7 – 3.1 l min <sup>-1</sup>                   |
| - nebuliser                | ESI PFA µflow                                   |
| - sample uptake rate       | 70 - 80 µl min <sup>-1</sup>                    |

**Figure Caption**

**Figure S1:** Triple-spike normalized, exponentially corrected  $^{208}\text{Pb}/^{204}\text{Pb} - ^{206}\text{Pb}/^{204}\text{Pb}$  plot for matrix batch runs ( $n = 5 - 18$  analyses) using the SRM 981 Pb standard. Also plotted: the triple-spike values<sup>1</sup> for the SRM 981 Pb standard  $\pm 2\text{SD}$  (square) and PCIGR annual averages  $\pm 2\text{SD}$  for the SRM 981 Pb standard during the period of the batch experiments (circles). Error bars: representative  $\pm 2\text{SD}$  for the individual batches.

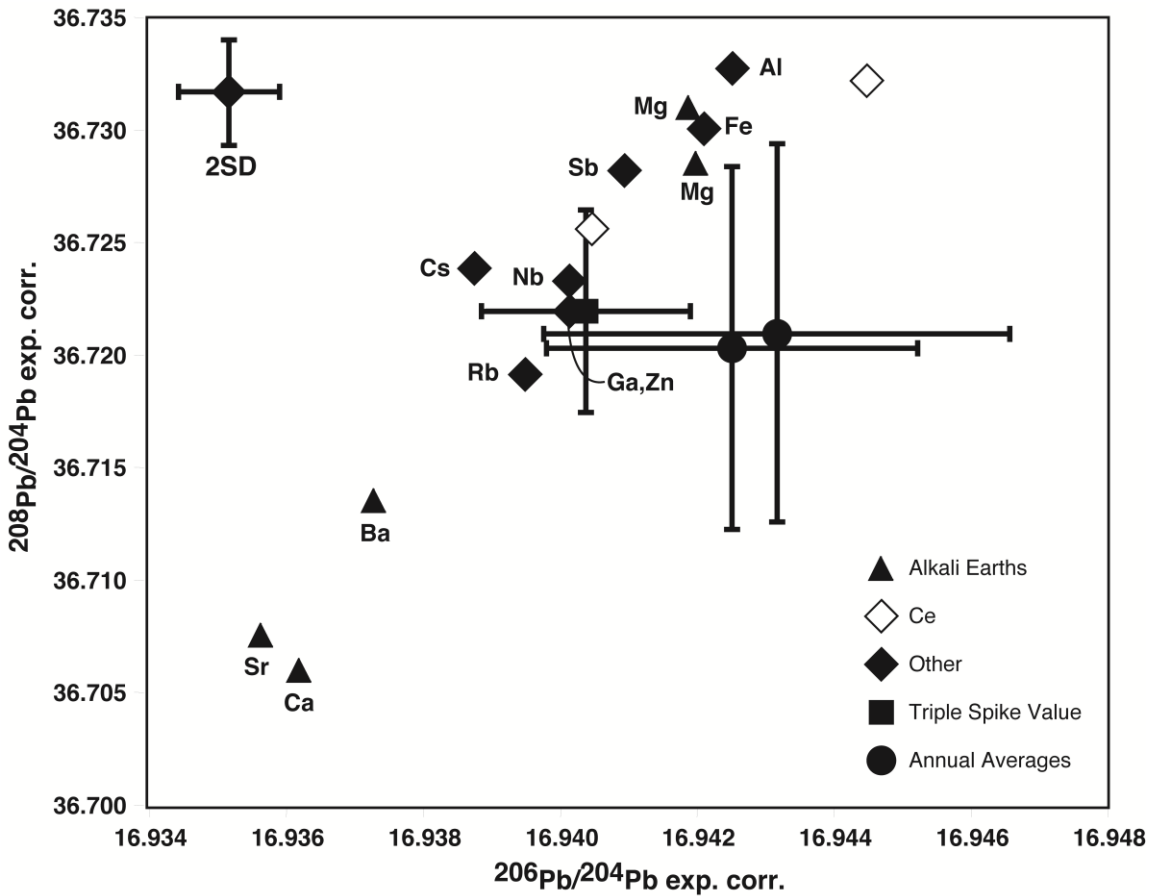

Supplement: c2ja10382f.pdf [file c2ja10382f.pdf]
